# Supplementary material for: Cause-Specific Stillbirth and Neonatal Death According to Prepregnancy Obesity and Early Gestational Weight Gain: A Study in the Danish National Birth Cohort
Source: MDPI journal article supplement (doi:10.3390/nu13051676), 2021-05-15
Supplement: s1 [file s1]

Supplementary Table 1.

Classification system<sup>a</sup> for primary cause of death - 302 singleton late stillbirths<sup>b</sup> and 255 singleton neonatal deaths<sup>b</sup> in 100,413 pregnancies included in The Danish National Birth Cohort.

| Categories                                       | Criteria                                                                                                                                                                                  | Stillbirth/neonatal death     | Number of deaths |
|--------------------------------------------------|-------------------------------------------------------------------------------------------------------------------------------------------------------------------------------------------|-------------------------------|------------------|
| <b>Congenital malformations</b>                  | Chromosome abnormalities<br>Neural tube defects<br>Inborn errors of metabolism<br>Heart defects<br>Renal abnormalities<br>Other abnormalities                                             | Stillbirth and neonatal death | 134              |
| <b>Unexplained intrauterine death</b>            | Unexplained death among fetuses that were normal weight for gestational age.                                                                                                              | Only stillbirth               | 84               |
| <b>Placental dysfunction <sup>c</sup></b>        | Intrauterine growth retardation (IUGR)<br>Infarction of placenta without IUGR<br>Placental abruption<br>Placenta previa                                                                   | Stillbirth and neonatal death | 106              |
| <b>Umbilical cord complications <sup>d</sup></b> | Fetal entanglement<br>Cord knot<br>Perforation of the umbilical cord<br>Vasa previa<br>Thrombosis                                                                                         | Stillbirth and neonatal death | 43               |
| <b>Antepartum bleeding <sup>e</sup></b>          | Excess bleeding of unknown origin                                                                                                                                                         | Stillbirth and neonatal death | < 3              |
| <b>Maternal conditions</b>                       | Preeclampsia<br>Hypertension<br>Diabetes mellitus<br>Rhesus isoimmunization<br>Other maternal conditions                                                                                  | Stillbirth and neonatal death | 22               |
| <b>Intrapartum events</b>                        | Birth trauma<br>Irregular fetal presentation<br>Rupture of the uterus<br>Aspiration of meconium<br>Intrapartum asphyxia, unknown cause                                                    | Stillbirth and neonatal death | 55               |
| <b>Preterm birth</b>                             | Immature respiratory system<br>Hyaline membrane disease (HMD)<br>HMD with intraventricular bleeding<br>HMD with infection<br>Intracranial bleeding including<br>Intraventricular bleeding | Only neonatal death           | 43               |
| <b>Infections</b>                                | Necrotizing enterocolitis (NEC)<br>Ante-, intra- and postpartum infection                                                                                                                 | Stillbirth and neonatal death | 35               |
| <b>Other specific conditions</b>                 | Specific conditions including sudden infant death.                                                                                                                                        | Stillbirth and neonatal death | 23               |
| <b>Unclassifiable</b>                            | death from any cause not classifiable to any of the other categories or lack of information                                                                                               | Stillbirth and neonatal death | 11               |

<sup>a</sup> A modified version of the classification suggested by Andersen KV et al in [Classification of perinatal and neonatal deaths. Fetal, obstetrical and neonatal causes]. Ugeskr Laeger 1991. 153;1494-1497. <sup>b</sup> Late stillbirth defined as stillbirths after 28 completed weeks of gestation, neonatal death as deaths within the first 28 days of life. <sup>c</sup> This category has been modified from the original system to include only placental dysfunction and both stillbirth and neonatal death. <sup>d</sup> This category was added to the original classification system. It was originally a subcategory in a category named 'fetal-placental dysfunction'. <sup>e</sup> This category has been modified from the original system: The subcategories 'Placental abruption' and 'Placenta previa' has been moved to the category 'Placental dysfunction'.
